# Supplementary figures and images for: Family of dumbbell Ni4Ln2 (Ln = Pr, Sm, Eu, Gd, Tb, Ho, Er) complexes: syntheses, structures, luminescent and magnetic properties
Source: Royal Society of Chemistry journal article supplement (doi:10.1039/c3dt32935f), 2013-01-01

## Supplementary Information

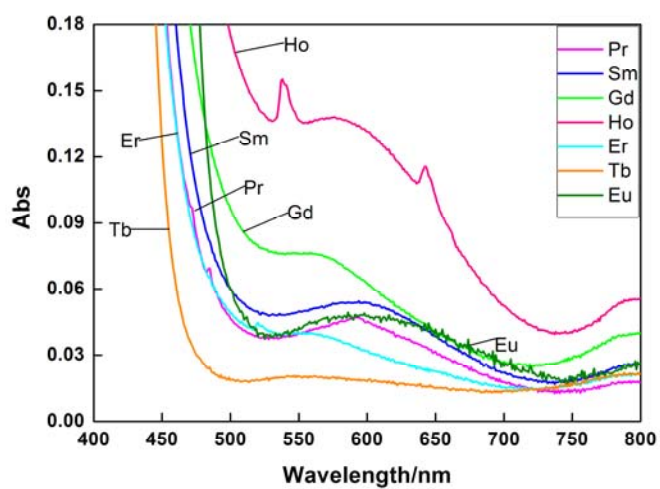

**Fig. S1** UV-vis spectra of the complexes **1-7**

Supplement: c3dt32935f.pdf [file c3dt32935f.pdf]
